# Supplementary material for: Ibrutinib Inhibits BTK Signaling in Tumor-Infiltrated B Cells and Amplifies Antitumor Immunity by PD-1 Checkpoint Blockade for Metastatic Prostate Cancer
Source: MDPI journal article supplement (doi:10.3390/cancers15082356), 2023-04-18
Supplement: s1 [file s1]

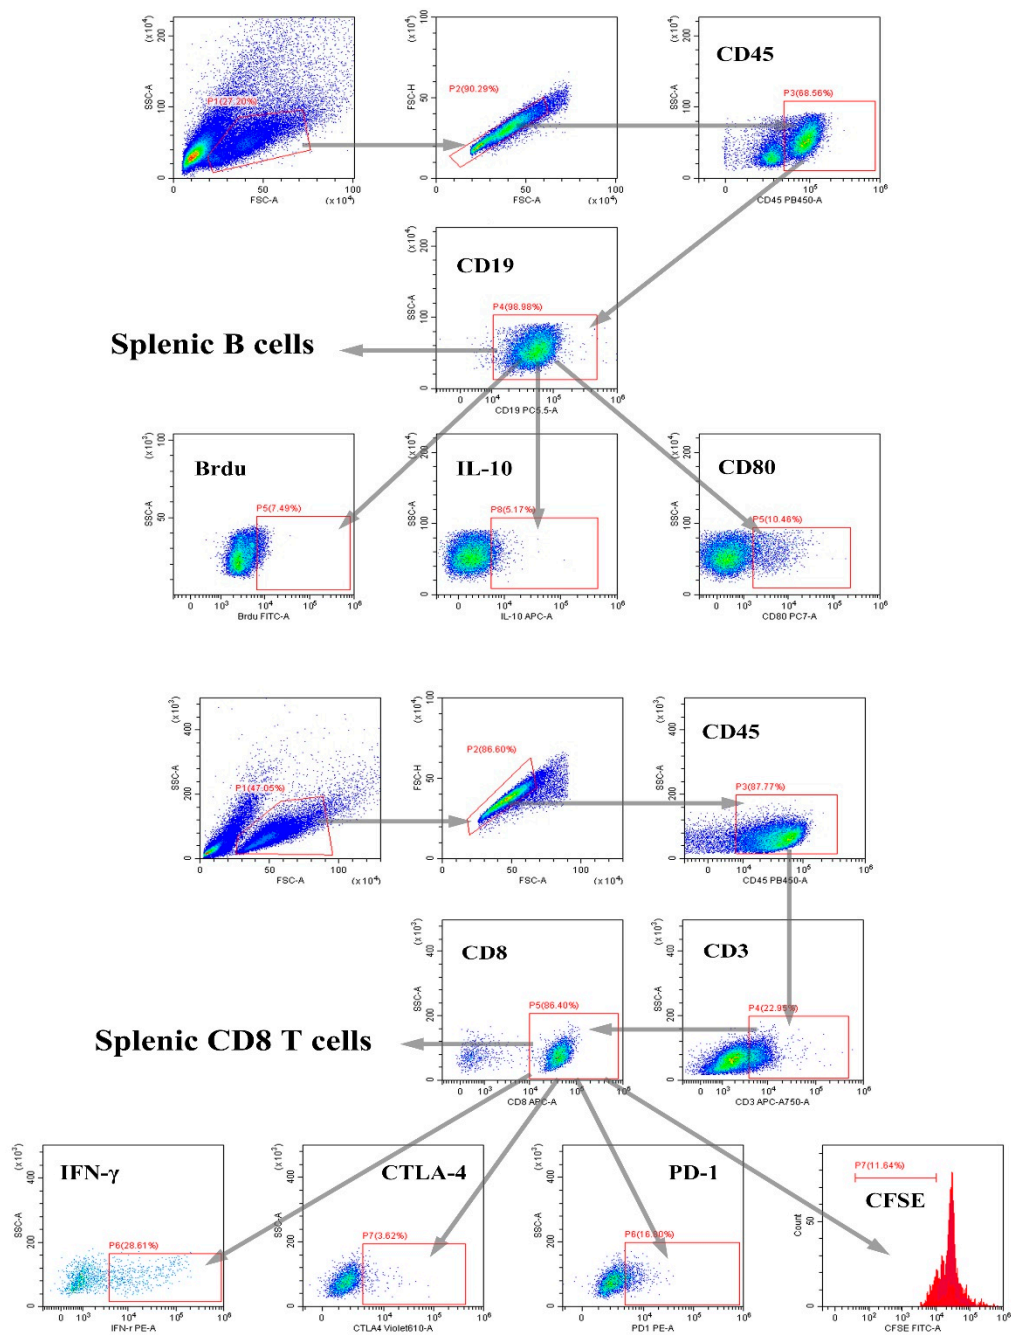

**Figure S1.** Gating strategy for in vitro study.

## Tumor-infiltrated B cells and CD8 T cells

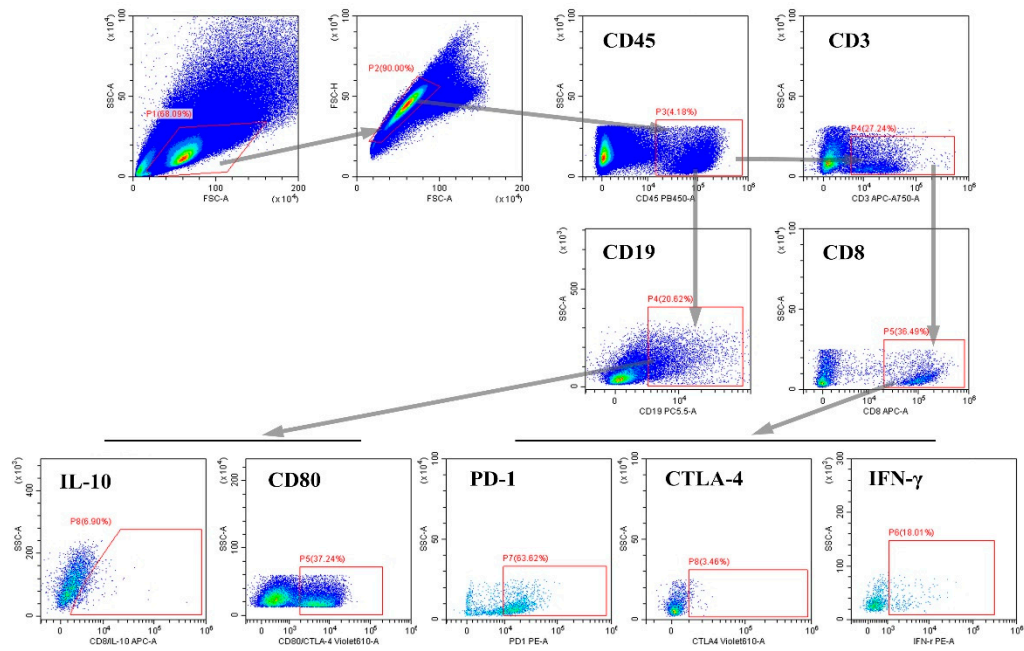

**Figure S2.** Gating strategy for in vivo study.

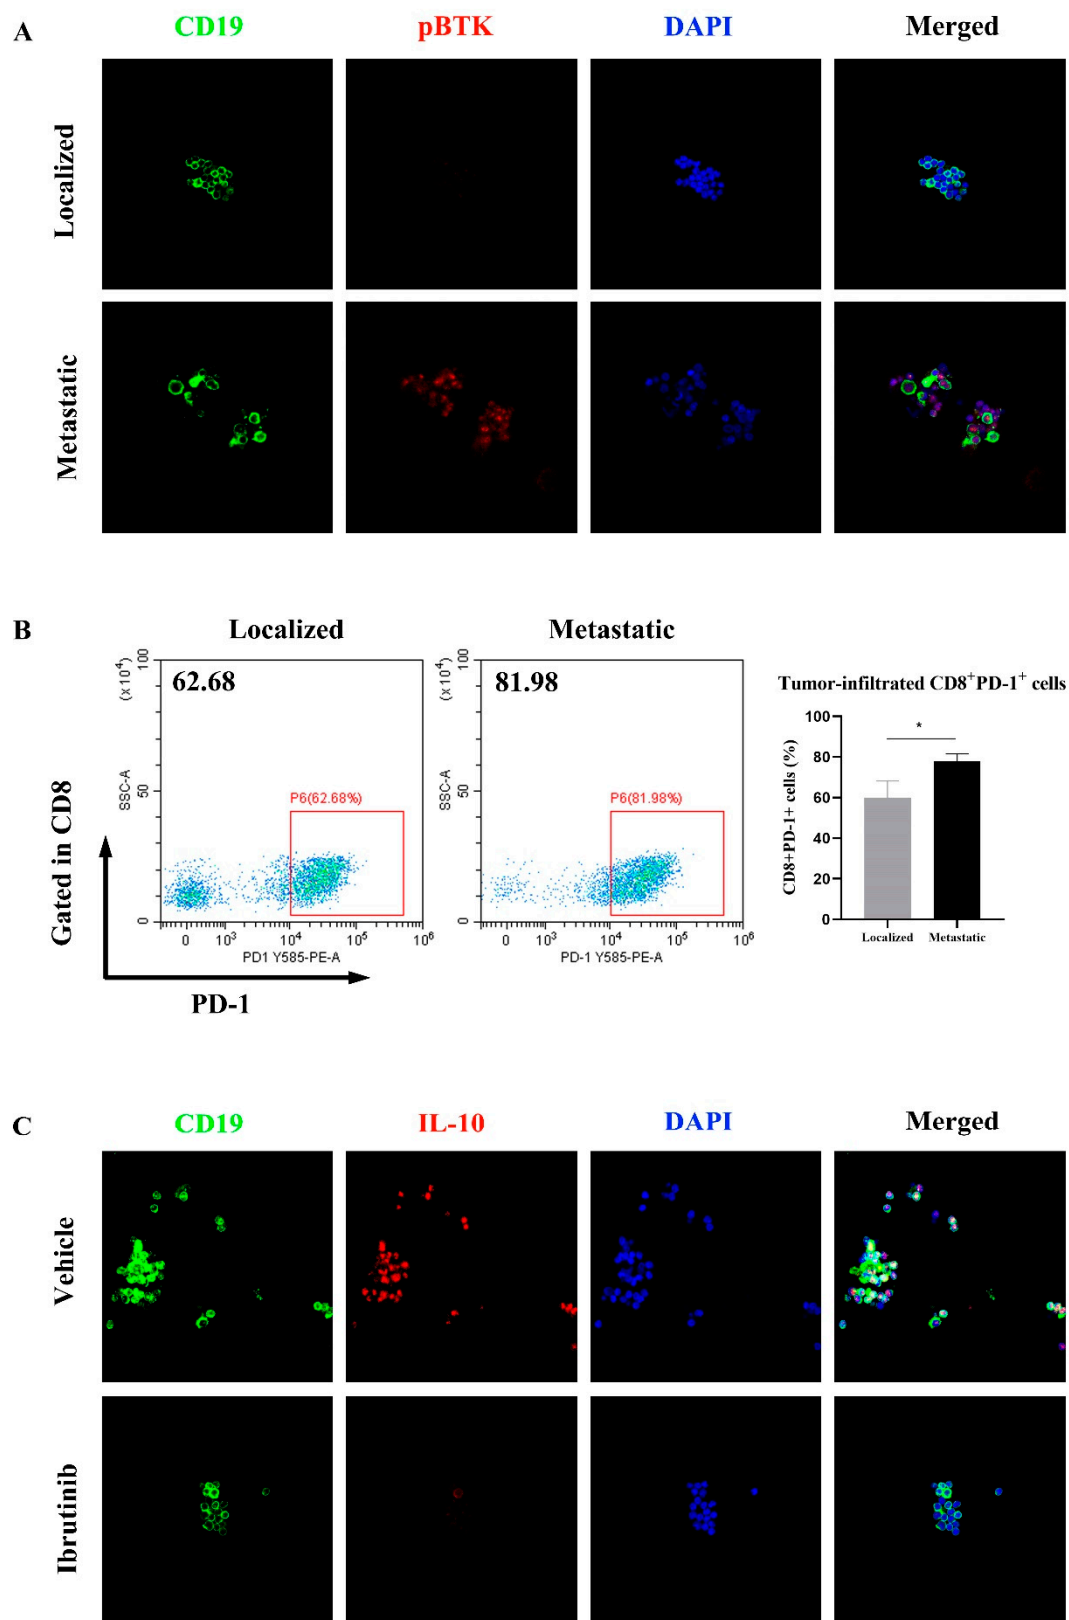

**Figure S3.** Validation of BTK phosphorylation and immunosuppressive molecules in tumor-infiltrating lymphocytes isolated from patients' prostate cancer tissues. (A) Representative

immunofluorescence images showing different BTK phosphorylation in tumor-infiltrating lymphocytes isolated from localized and metastatic prostate cancers (Original magnification: 400×). (B) Flow cytometry plots showing tumor-infiltrating CD8<sup>+</sup>PD-1<sup>+</sup> T cells were significantly higher in metastatic prostate cancers than that of in localized ones (n=3). (C) IL-10 productions in B cells purified from tumor-infiltrating lymphocytes in metastatic cancers were decreased after ibrutinib (1  $\mu$ M) treatment for 24 hours (Original magnification: 400×). A p value less than 0.05 was considered statistically significant. \*,  $p < 0.05$ .

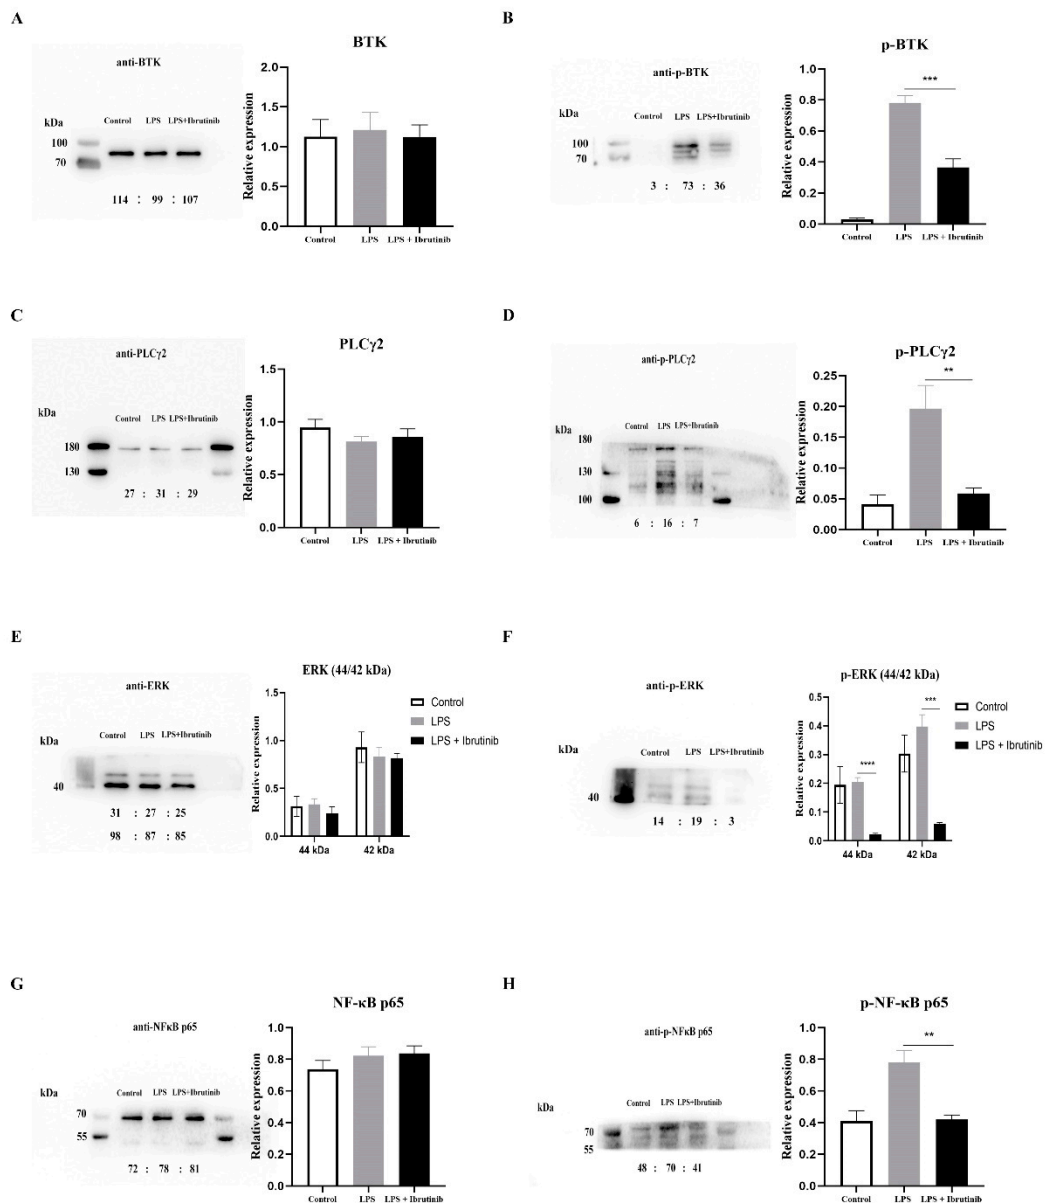

**Figure S4.** Western blots with molecular weight markers and intensity ratio (relative to GAPDH) of each band. A  $p$  value less than 0.05 was considered statistically significant. \*\*,  $p < 0.01$ ; \*\*\*,  $p < 0.001$ .

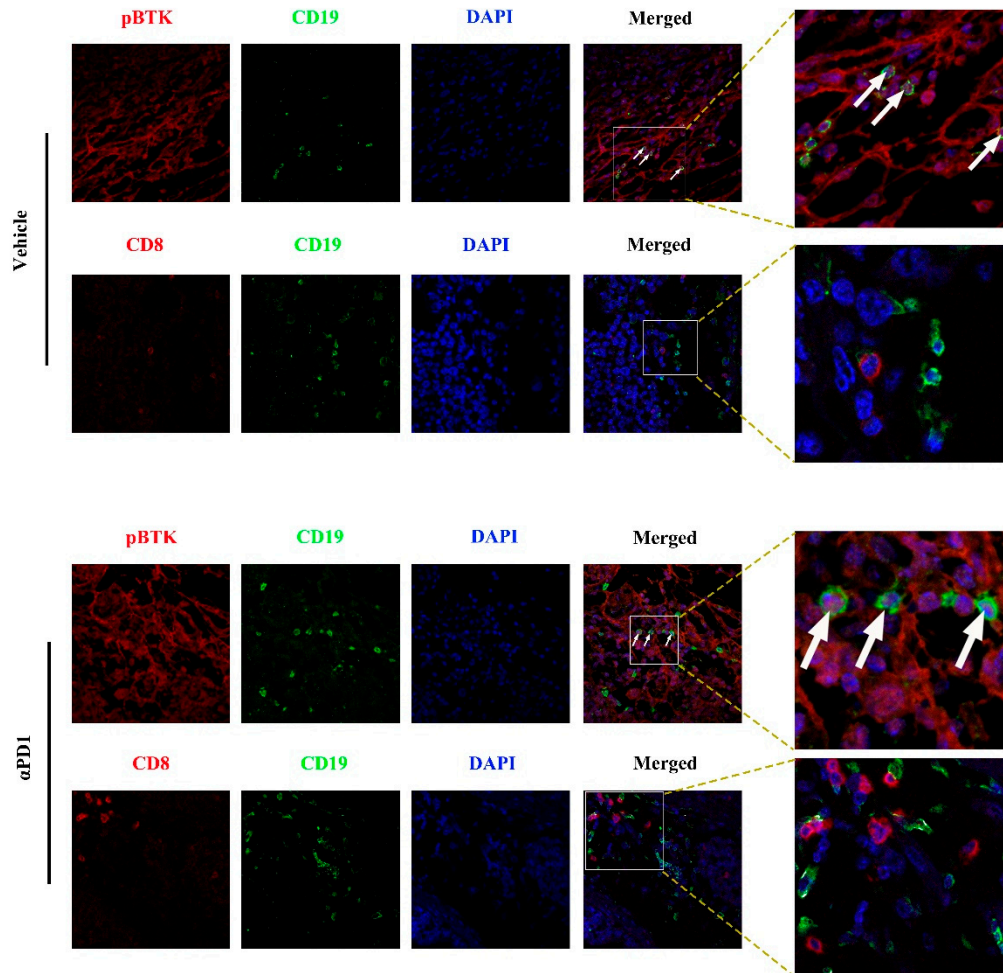

**Figure S5.** Representative images of BTK phosphorylation in tumor-infiltrating B cells and CD8<sup>+</sup> T cells infiltration in orthotopic prostate tumor of mice in αPD-1 monotherapy and vehicle groups (original magnification: 400×).



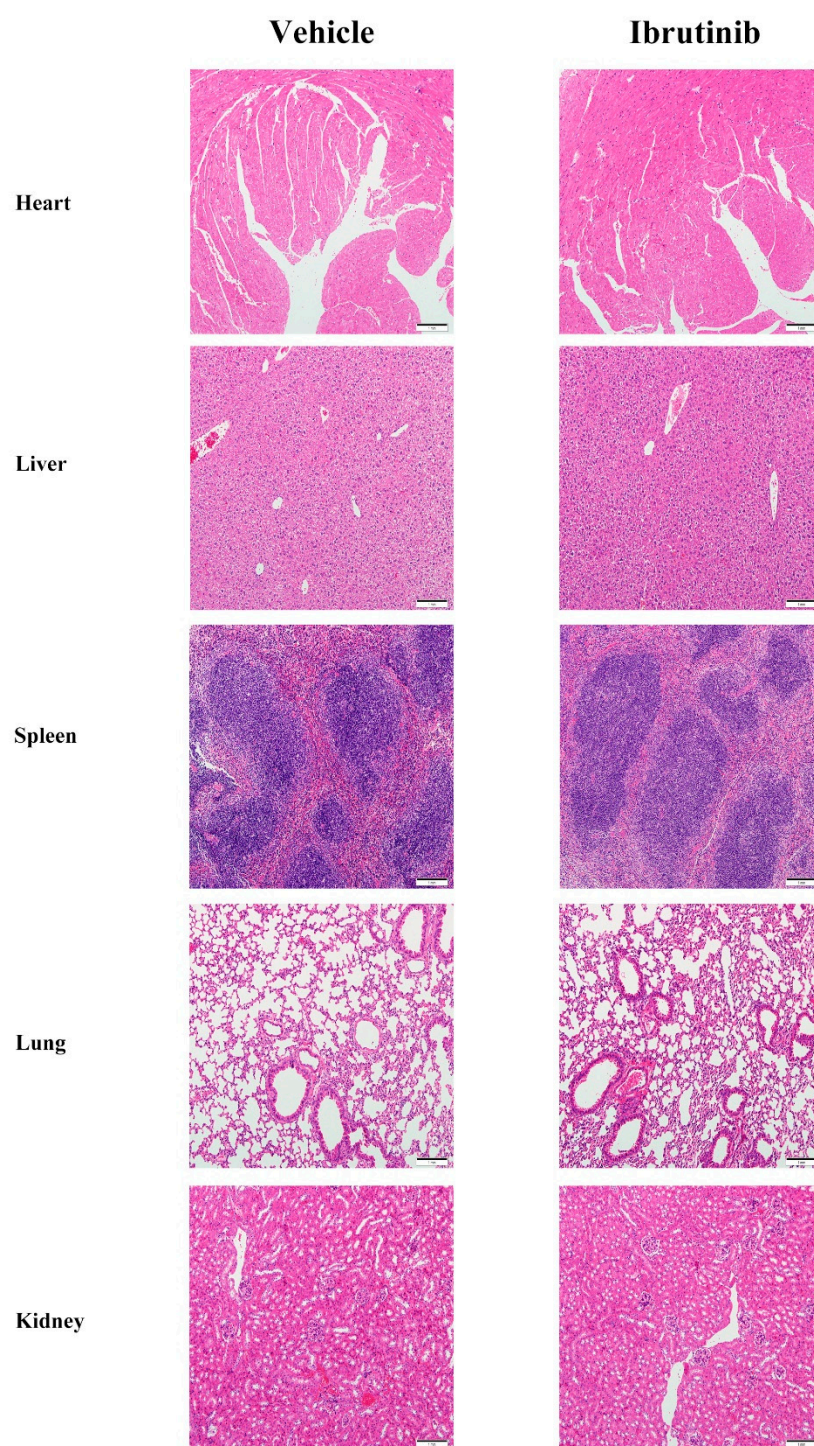

**Figure S6.** Pathological evaluation of mouse vital organ damage. Representative HE staining images show no pathological change in mouse hearts, livers, spleens, lungs, and kidneys after continuous ibrutinib administration (original magnification: 100×).

**Table S1.** Average expression of each protein relative to GAPDH in B cells detected by Western Blot.

| Proteins               | Intensity     |               |                 |
|------------------------|---------------|---------------|-----------------|
|                        | Control       | LPS           | LPS + Ibrutinib |
| BTK                    | 1.124         | 1.212         | 1.123           |
| p-BTK                  | 0.030         | 0.780         | 0.366           |
| PLC $\gamma$ -2        | 0.946         | 0.815         | 0.855           |
| p-PLC $\gamma$ -2      | 0.041         | 0.197         | 0.059           |
| ERK (44/42 kDa)        | (0.314/0.930) | (0.334/0.833) | (0.242/0.817)   |
| p-ERK (44/42 kDa)      | (0.194/0.304) | (0.205/0.397) | (0.023/0.059)   |
| NF- $\kappa$ B (p65)   | 0.738         | 0.822         | 0.838           |
| p-NF- $\kappa$ B (p65) | 0.412         | 0.780         | 0.421           |
